# Supplementary material
Source: PubMed Central journal article supplement (PMC4935553)
Supplement: NIHMS785259-supplement-1.pdf [file NIHMS785259-supplement-1.pdf]

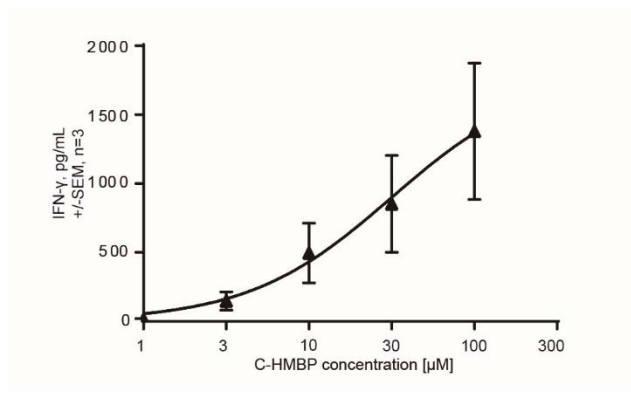

**Supplemental Figure 1. IFN $\gamma$  secretion induced by C-HMBP.** Quantification of IFN $\gamma$  secretion following 2 hour C-HMBP pre-treatment and 24 hour incubation with effector cells.

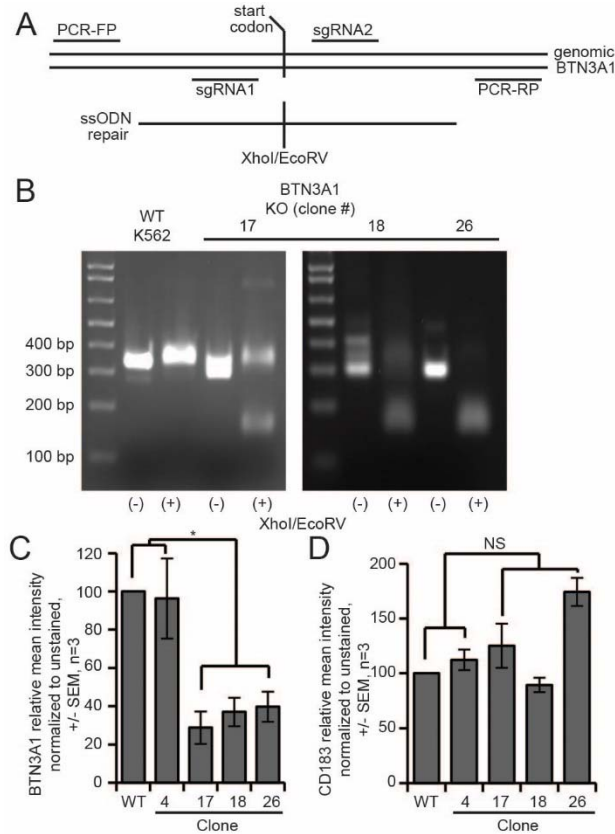

**Supplemental Figure 2. Disruption of BTN3A1 expression in target cells.** A) Schematic of design for knockout utilizing CRISPR/Cas9. The start codon was excised from genomic DNA using paired single strand breaks and replaced with a dual restriction site using an ssODN repair template to facilitate genotyping of clones. B) PCR genotyping of wild-type K562 cells and three BTN3A1 CRISPR/Cas9 knockout clones that displayed the desired genotype. C) Quantification of BTN3A1 surface expression in WT, clone 4 and three BTN3A1 CRISPR/Cas9 knockout clones, as analyzed by flow cytometry. D) Quantification of surface expression of CD183 in WT, clone 4 and three BTN3A1 CRISPR/Cas9 knockout clones, as analyzed by flow cytometry.

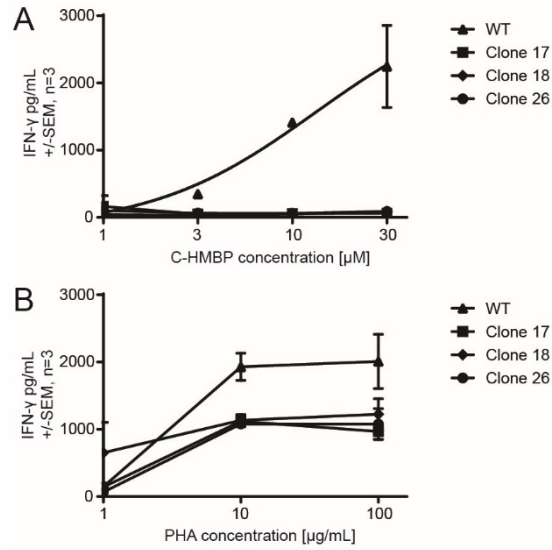

**Supplemental Figure 3. IFN $\gamma$  secretion induced by C-HMBP is abrogated by depletion of BTN3A1.** WT K562 cells or BTN3A1 deficient K562 clones 17, 18 and 26 were preloaded for 2 hours with the indicated concentrations of C-HMBP (Panel A) or PHA-P (Panel B). Loaded cells were washed and exposed to effector V $\gamma$ 9V $\delta$ 2 T cells for 24 hours, then IFN- $\gamma$  was determined by ELISA.

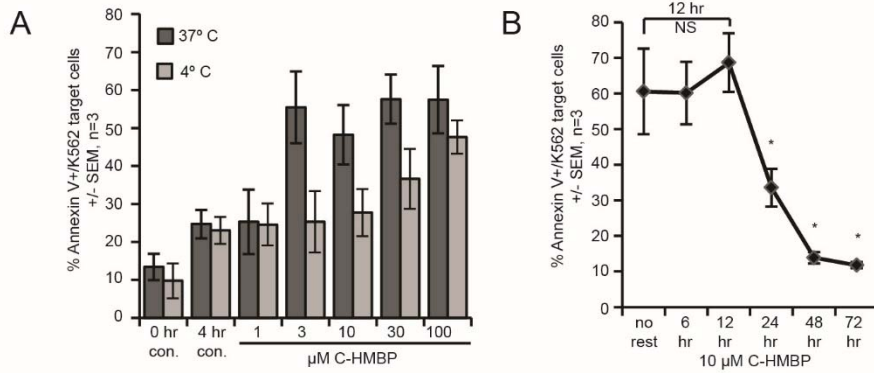

**Supplemental Figure 4. Lysis assays with C-HMBP.** A) C-HMBP requires energy dependent uptake to enter target cells. C-HMBP dose response lysis assay at 37°C and 4°C. B) Metabolism of C-HMBP. Time course lysis assay of K562 cells pre-treated for 2 hours with 10 μM C-HMBP. K562 cells were rested for 0 hours (no rest), 6 hours, 12 hours, 24 hours, 48 hours or 72 hours. Once rested, cells were incubated with effector cells for 4 hours. \*, significant compared to no rest.
